# Supplementary material for: A Discontinuous Individual Growth Model of Swimming Crab Portunus trituberculatus and Its Application in the Nutrient Dynamic Simulation in an Intensive Mariculture Pond
Source: Frontiers journal article supplement (doi:10.3389/fmars.2022.918449), 2022-05-31
Supplement: Data_Sheet_1.docx [file Data_Sheet_1.docx]

**FIGURES**


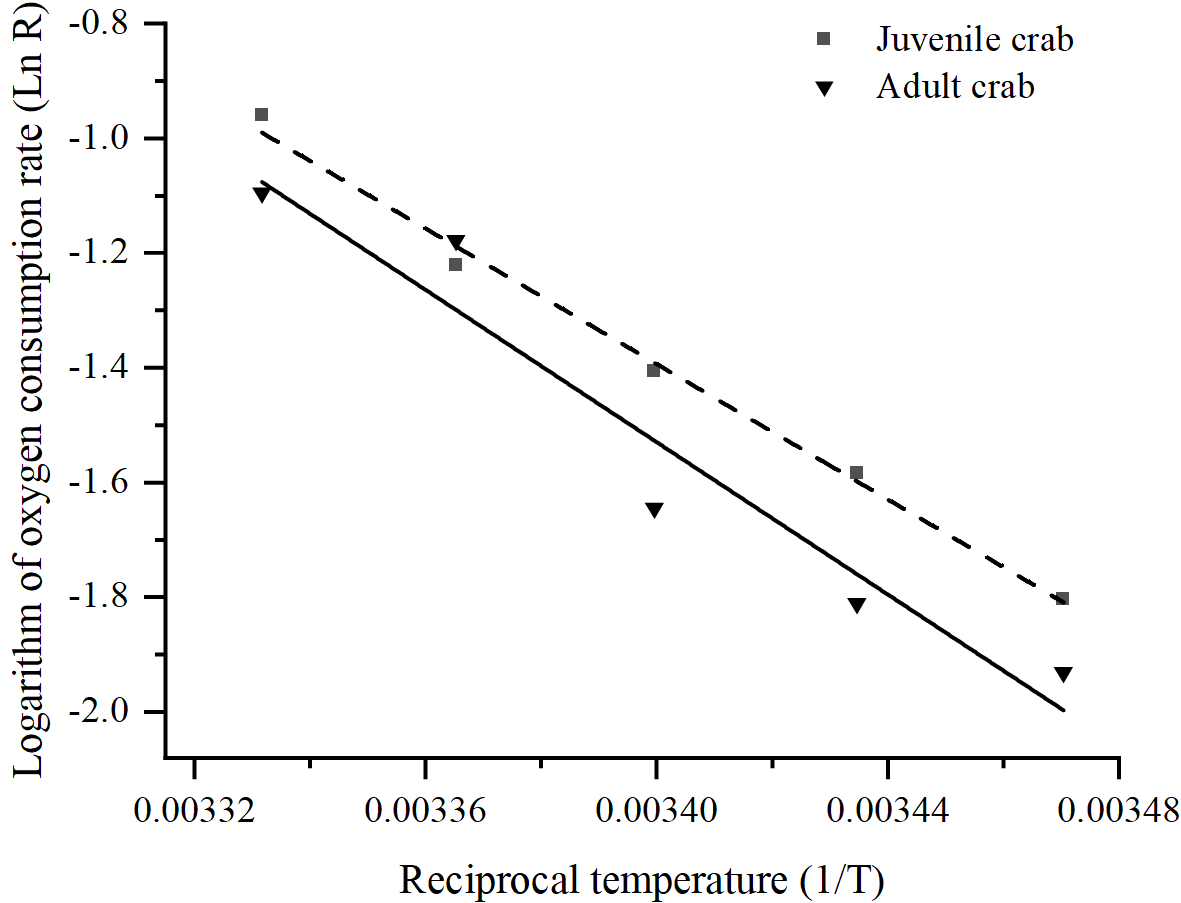


**FIGURE A1**

Arrhenius plot (ln rate versus 1/T) for the oxygen consumption data of juvenile and adult crab. Arrhenius temperature: juvenile crab: 5902±257 K (n=5; R2=0.99); adult crab: 6639±997K (n=5; R2=0.94). Average Arrhenius temperature: 6270K.


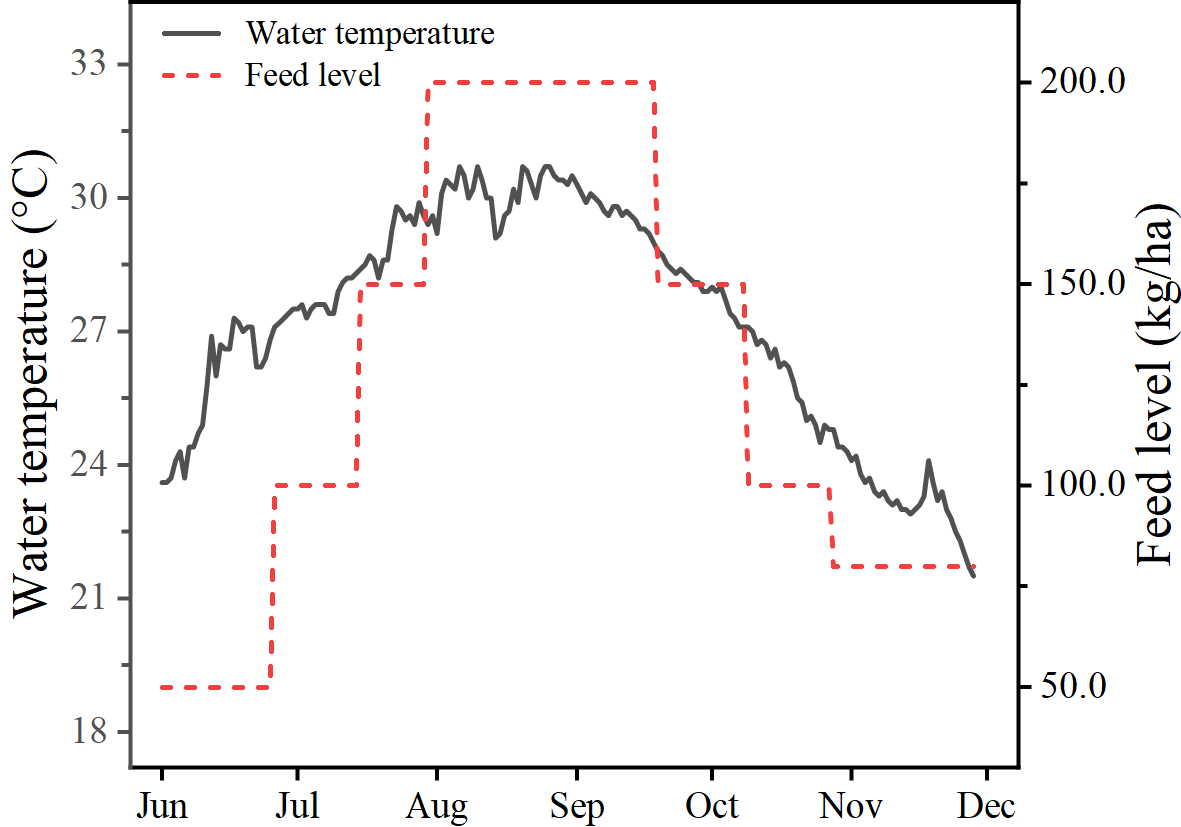


**FIGURE A2**

Temporal variation in water temperature and feed level in the experimental integrated multi-trophic aquaculture pond.


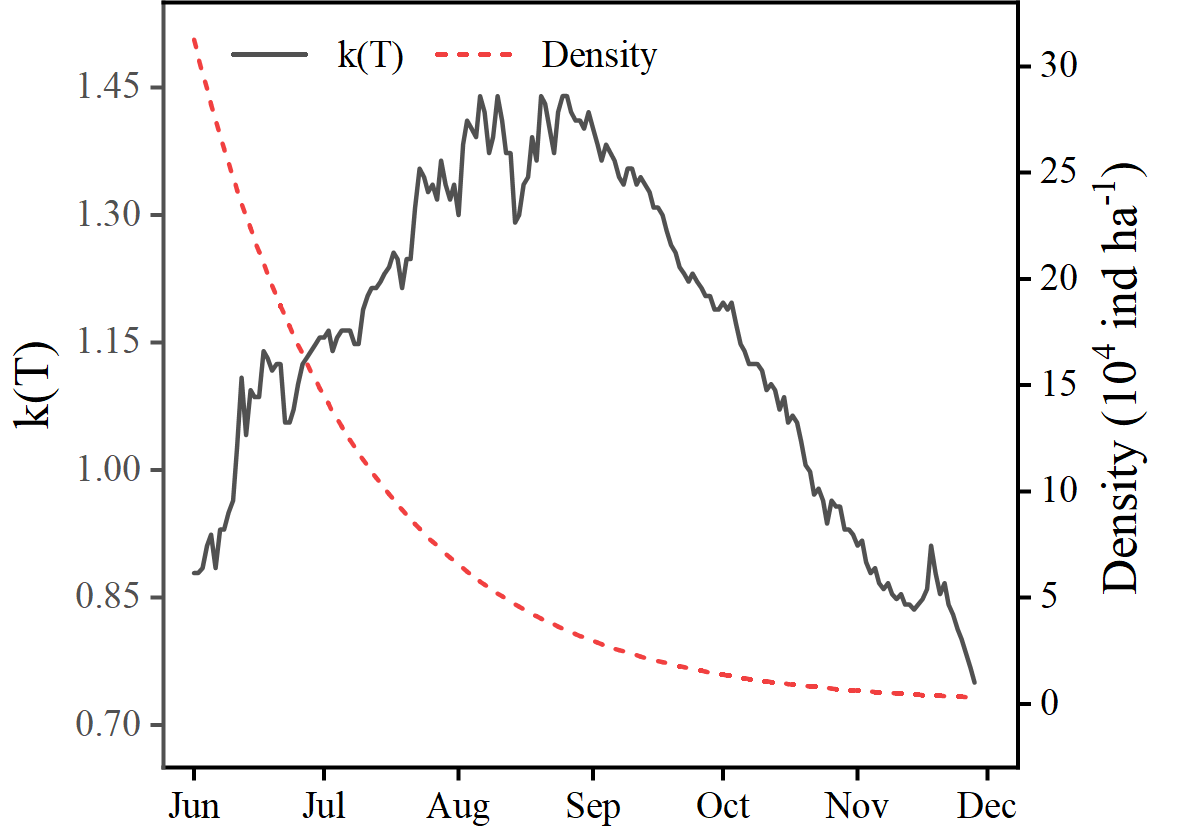


**FIGURE A3**

Temporal variation of temperature dependent function k(T) of the *Portunus trituberculatus* DEB model and density of *Portunus trituberculatus* in the experimental integrated multi-trophic aquaculture pond
